# Supplementary material for: Comparative Analysis of the miRNome of Bovine Milk Fat, Whey and Cells
Source: PubMed Central journal article supplement (PMC4839614; doi:10.1371/journal.pone.0154129), 2016-04-21

## S2-1 Enriched molecular functions of why highly enriched miRNAs

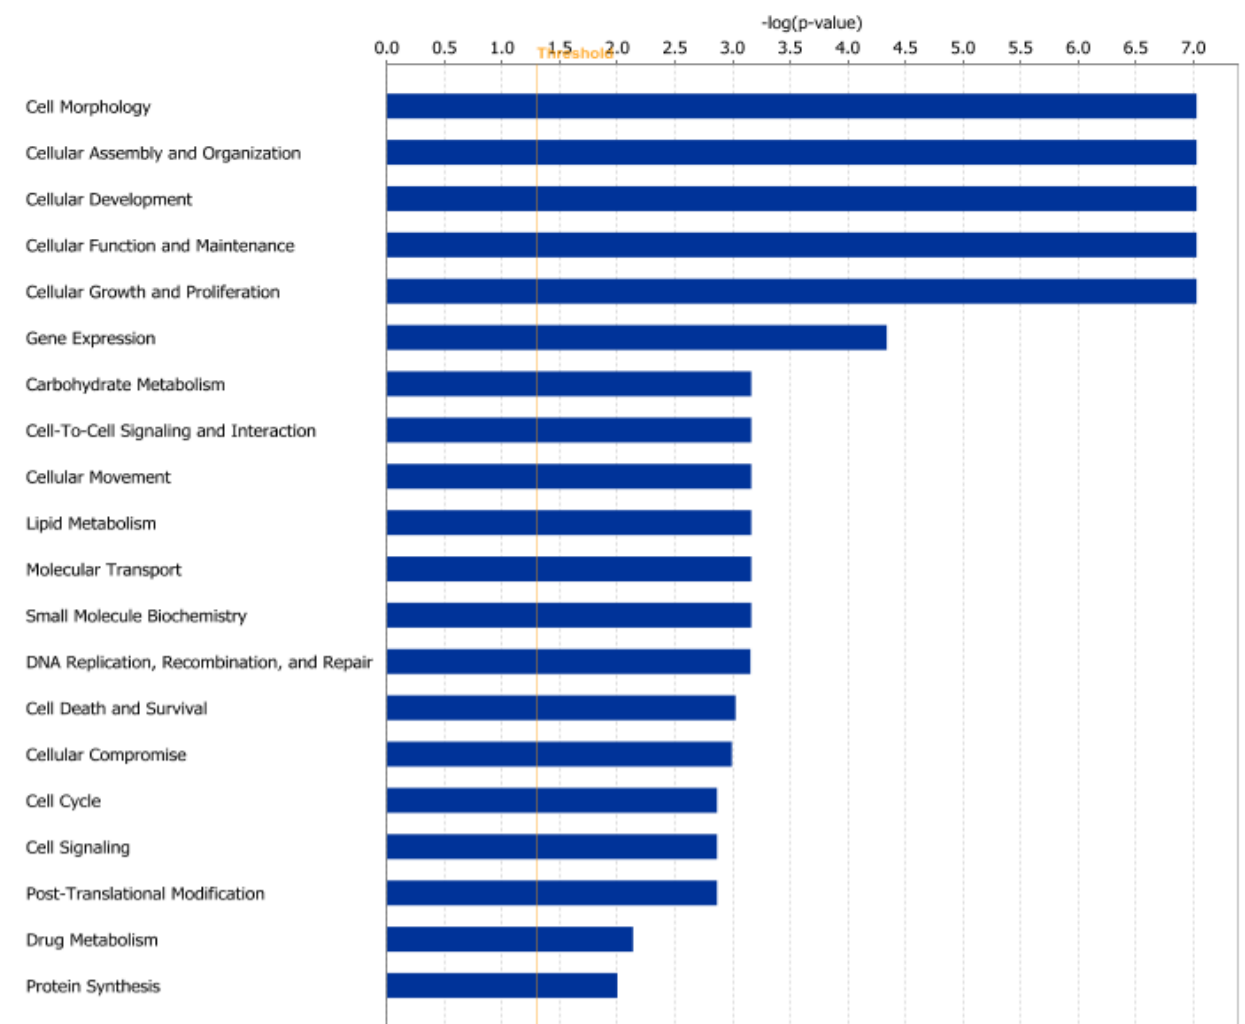

## S2-2 Enriched physiological and developmental functions of why highly enriched miRNAs

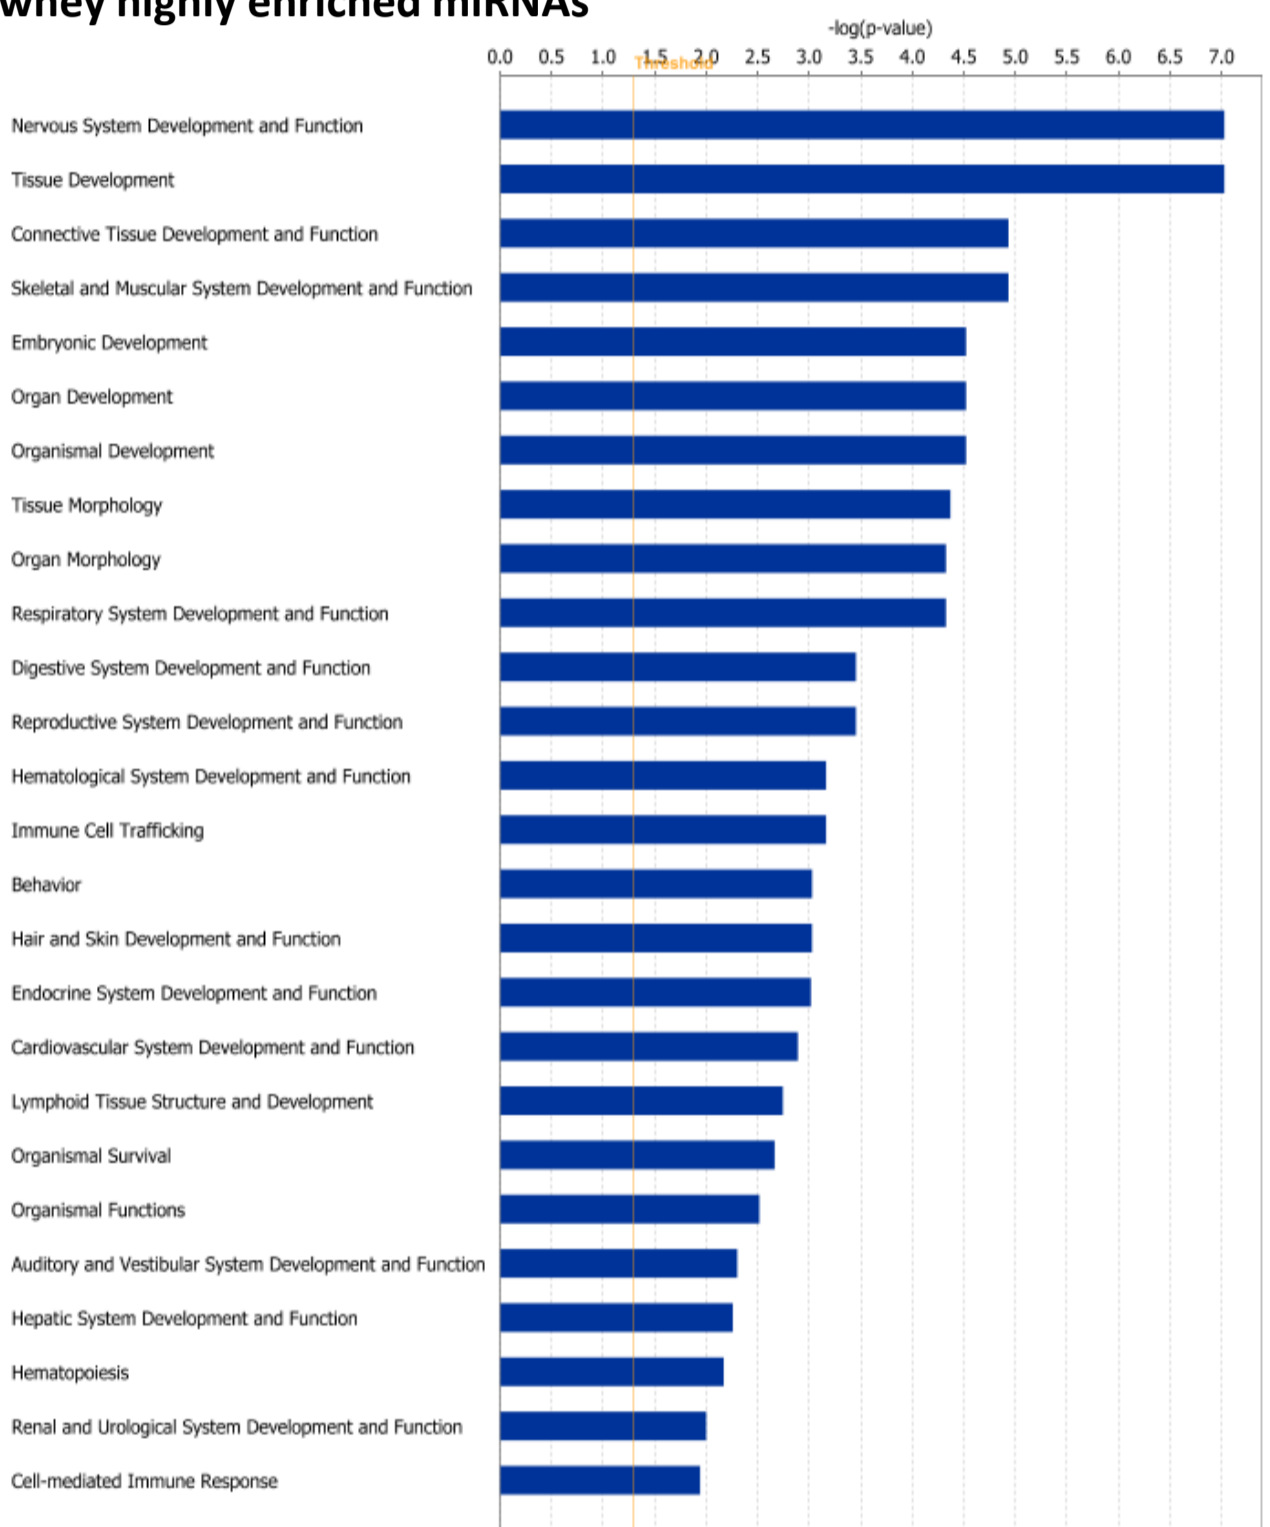

## S3-3 Enriched diseases of why highly enriched miRNAs

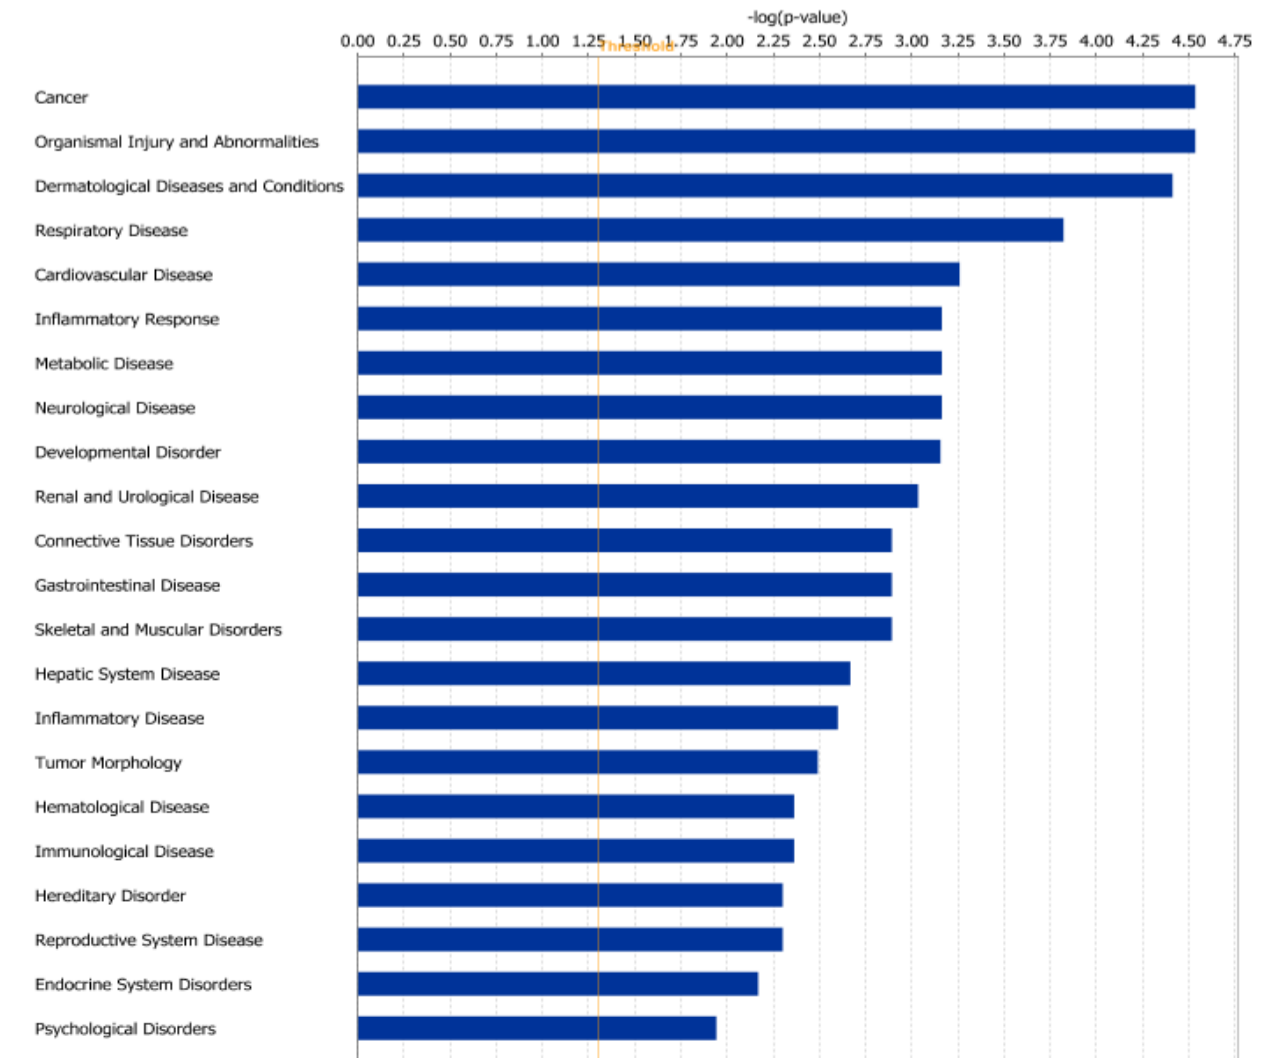

Supplement: pone.0154129.s002.pdf [file pone.0154129.s002.pdf]
