# Supplementary material for: Comparative Analysis of the miRNome of Bovine Milk Fat, Whey and Cells
Source: PubMed Central journal article supplement (PMC4839614; doi:10.1371/journal.pone.0154129), 2016-04-21

### S3-1 Enriched molecular functions of cell highly enriched miRNAs

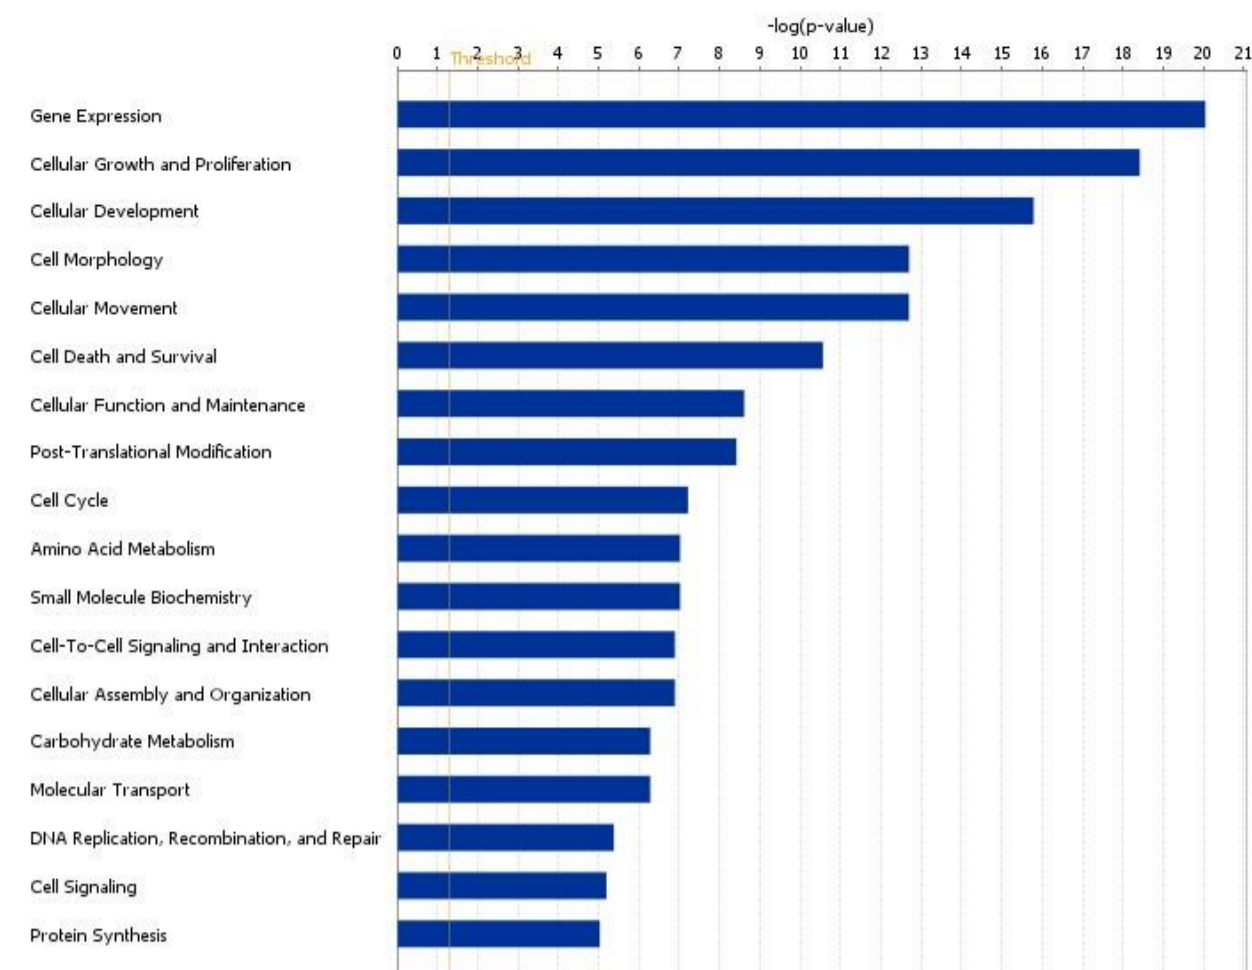

### S3-2 Enriched physiological and developmental functions of cell highly enriched miRNAs

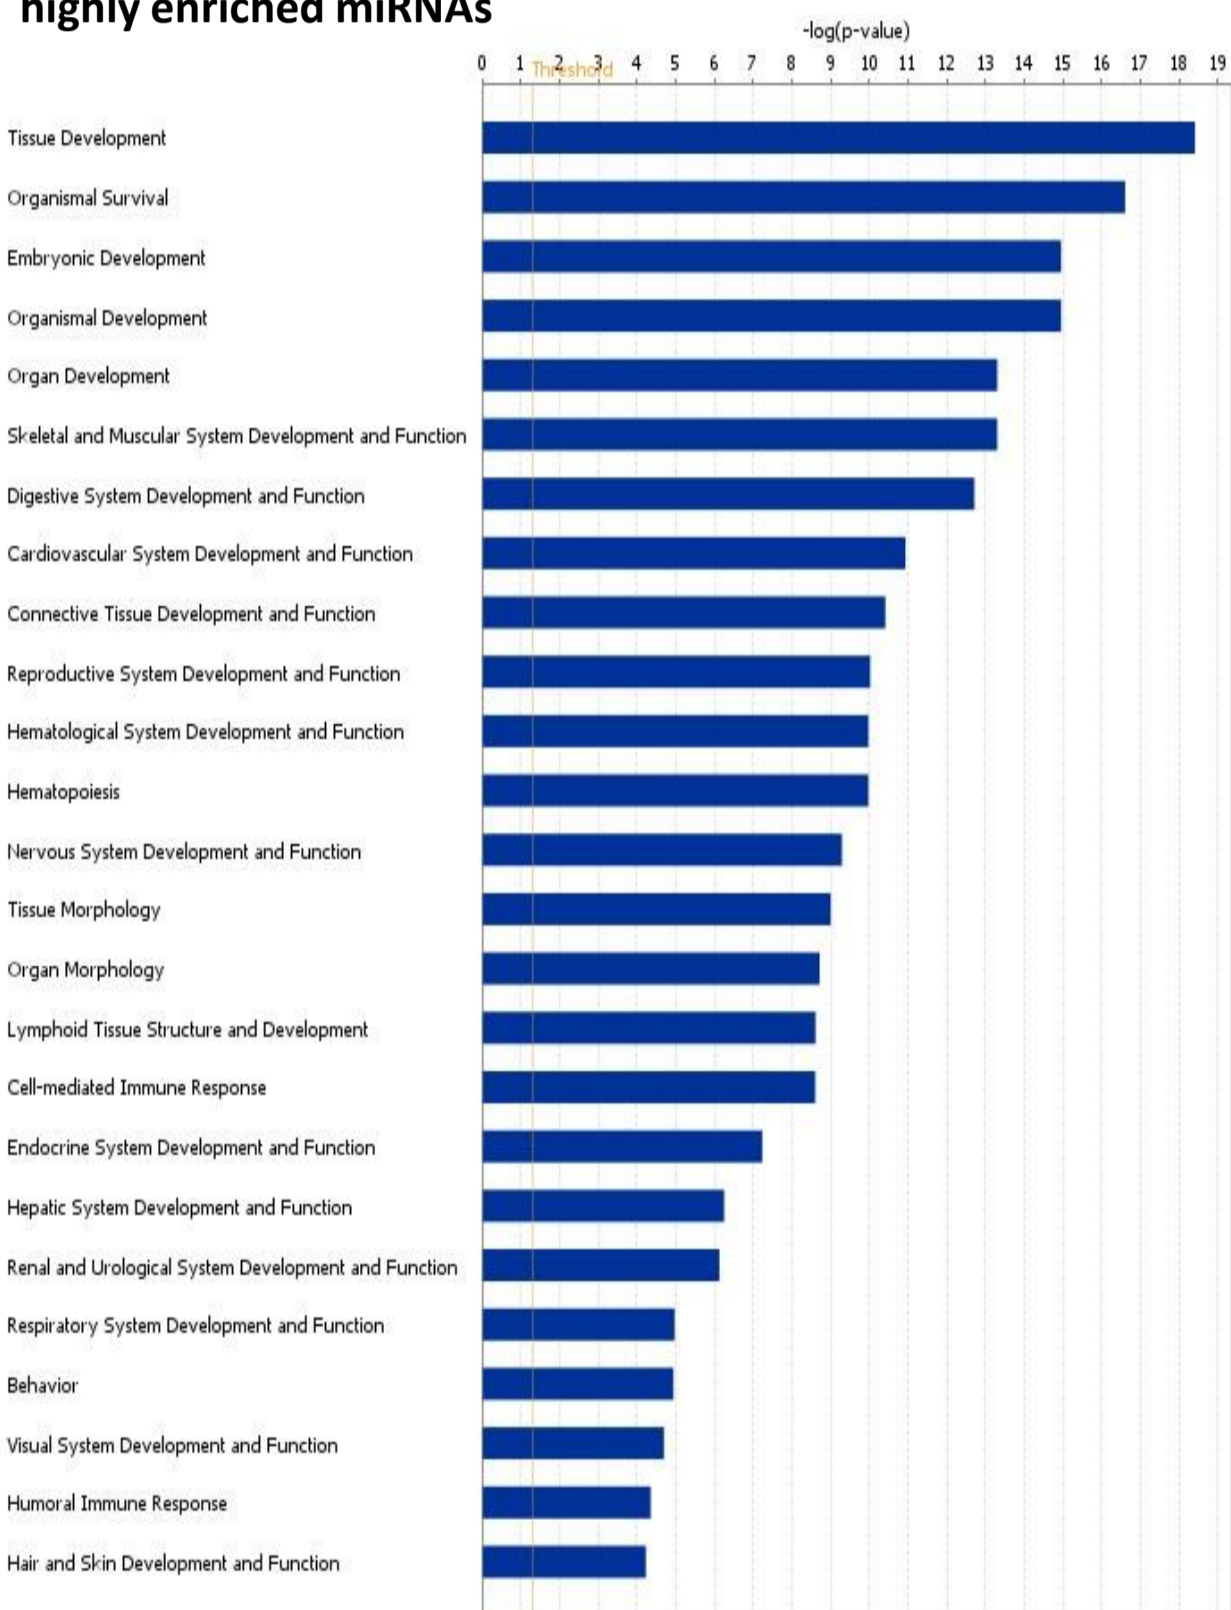

### S3-3 Enriched diseases of cell highly enriched miRNAs

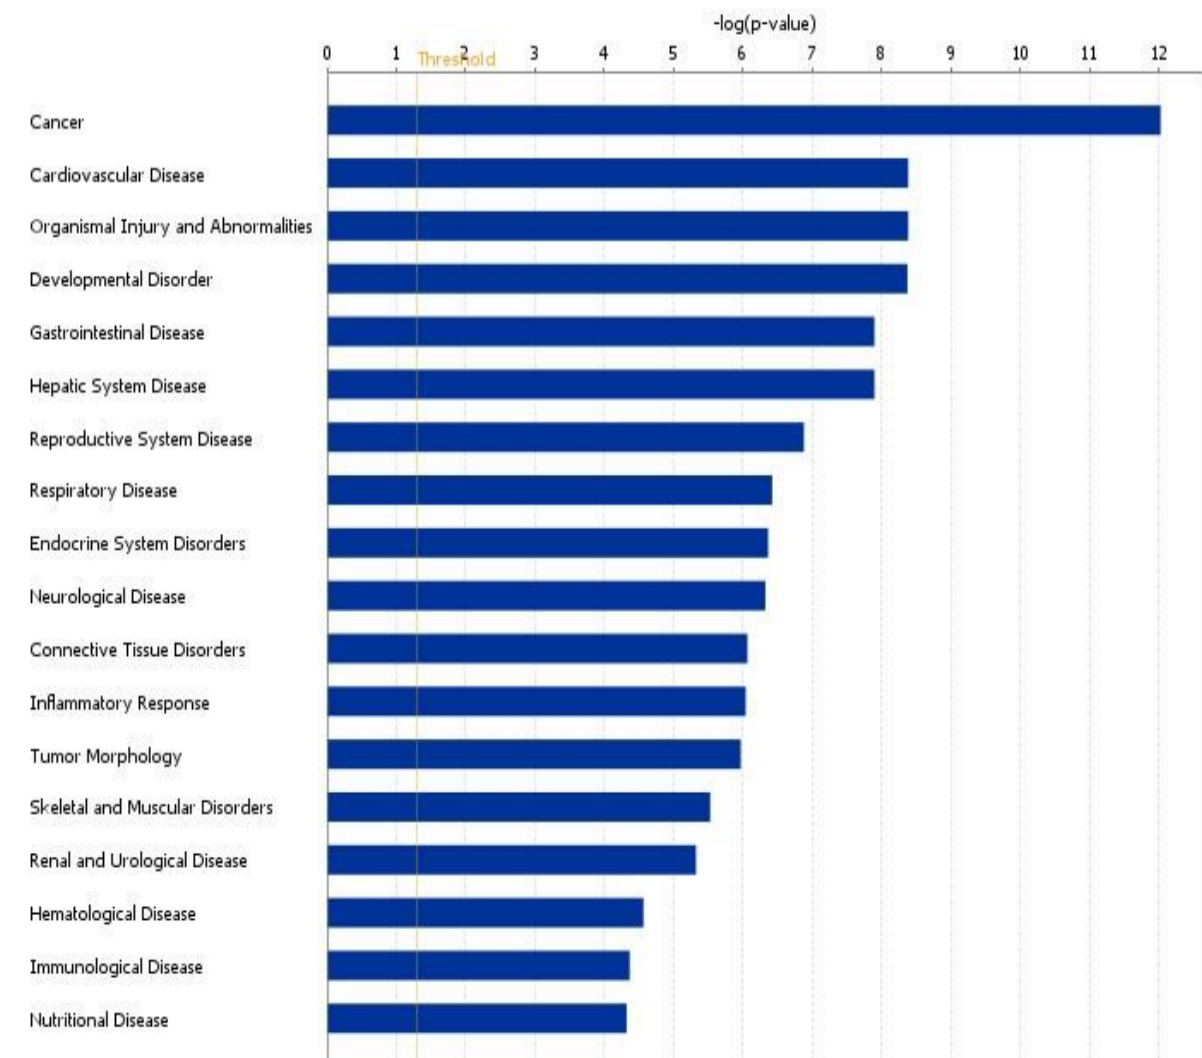

Supplement: pone.0154129.s003.pdf [file pone.0154129.s003.pdf]
