# Supplementary material for: Comparative Analysis of the miRNome of Bovine Milk Fat, Whey and Cells
Source: PLoS One. 2016 Apr 21;11(4):e0154129. doi: 10.1371/journal.pone.0154129 (PMC4839614; doi:10.1371/journal.pone.0154129)
Supplement: S4 Table — (XLSX) [file pone.0154129.s008.xlsx]

## Sheet: S4 Table
S4 Table: Novel miRNA genomic location and sequence information. The same miRNA from different precursors are highlighted.
mature miRNA seq ID	mature seq	length	precursor seq	genomic location (UMD3.1)
bta-miR-EIA10_2262	ugaggggcagagagugagaa	20	uucacuuucacccccaauuagcuagcuagcuugaggggcagagagugagaa	10:13002726..13002777:-
bta-miR-EIA10_2318	aaacccugaugaacuuuuuggc	22	gaaaguucguuccgguuuuucuguaagauguuauggaaaaacccugaugaacuuuuuggc	10:17362789..17362849:-
bta-miR-EIA10_2318	aaacccugaugaacuuuuuggc	22	gaaaguucguuccgguuuuucuguaagauguuauggaaaaacccugaugaacuuuuuggc	10:17362789..17362849:-
bta-miR-EIA10_2454	aagcccugaaugaacuuuuugg	22	aaaaaguucguucagaucuuuccauauaauuguauagaaagcccugaaugaacuuuuugg	10:28818905..28818965:-
bta-miR-EIA10_2454	aagcccugaaugaacuuuuugg	22	aaaacauucauuugaauuuuuccauaacaucagauggaaagcccugaaugaacuuuuugg	5:83107288..83107348:+
bta-miR-EIA10_2454	aagcccugaaugaacuuuuugg	22	caaaaguucauuugguuuuuuccauaacaucuuuaccaaaaagcccugaaugaacuuuuugg	3:33354102..33354164:-
bta-miR-EIA11_3042	ggggcgggagcggccgggguc	21	ggggcgggagcggccggggucuccgaguggcuggugcugcgggacggcugcaugcgcugcga	11:14980065..14980127:+
bta-miR-EIA11_3211	aaaacccgaaggaacuuuuug	21	aaaaaguucauucggguuucucuguaacaggcuaugggaaaacccgaaggaacuuuuug	11:48683992..48684051:+
bta-miR-EIA11_3211	aaaacccgaaggaacuuuuug	21	aaaaguucauucagguuuuucugcucuaucuaauggaaaaacccgaaggaacuuuuug	28:5316921..5316979:+
bta-miR-EIA11_3211	aaaacccgaaggaacuuuuug	21	aaaaaguucauucggguuucucuguaacaggcuaugggaaaacccgaaggaacuuuuug	11:48683992..48684051:+
bta-miR-EIA11_3211	aaaacccgaaggaacuuuuug	21	aaaaguucauucagguuuuucugcucuaucuaauggaaaaacccgaaggaacuuuuug	28:5316921..5316979:+
bta-miR-EIA11_3253	aaaaaguucguucggguuuucu	22	aaaaaguucguucggguuuucugagccauguuacagaaaaacuugagugaacuuu	11:60611027..60611082:+
bta-miR-EIA11_4430	ggcugaggcuggaggaucgcu	21	caguccuggaggccagaagucugaaaguagucccagcuacuuggcgggcugaggcuggaggaucgcu	11:89658805..89658872:-
bta-miR-EIA12_4806	aaaaguucguucggguuuuu	20	aaaaguucguucggguuuuuuguuuacagcucacuagaaaaacccaaaugaacucuuug	12:16533031..16533090:+
bta-miR-EIA13_5596	aaaaccugaacaaacuuuuug	21	aagaaguucguuuggguuuuuccuuuaagugguauggaaaaccugaacaaacuuuuug	13:19122368..19122426:+
bta-miR-EIA13_5721	cuugcugagugaccucccugcu	22	cagggaggugucucagugacaaguuuaaucccccuggggcuuuacaaacuugcugagugaccucccugcu	13:39299093..39299163:+
bta-miR-EIA13_5741	aaaacuugaaugaaccuuuugg	22	aagaaguucaaucggguuuuuccauacuagcuccuggaaaaacuugaaugaaccuuuugg	13:40094274..40094334:+
bta-miR-EIA13_5741	aaaacuugaaugaaccuuuugg	22	aaaaaauguguuugaguuuuuccauaccaucuuauggaaaaacuugaaugaaccuuuugg	2:96920249..96920309:-
bta-miR-EIA13_5741	aaaacuugaaugaaccuuuugg	22	agaaguucguucagguuuuucuguaagacgguauggaaaacuugaaugaaccuuuugg	10:101213572..101213630:-
bta-miR-EIA16_10012	agcaccugcugugucccccacagc	24	uguggggggcgugcaggggccggggaagcugucaaggacccagcaccugcugugucccccacagc	16:51768452..51768517:-
bta-miR-EIA16_9162	ggcggcggcggcgccggggc	20	ggcggcggcggcgccggggcaucgccggggcgggagcgggagcucggccgccccgcaagccgacccggggggcgcaggccgguag	16:26800406..26800491:+
bta-miR-EIA16_9639	aaacccugaaugaaccuuuugg	22	aagaccuucguucaggguuuuccauuagauguuacagaaaacccugaaugaaccuuuugg	16:80333017..80333077:+
bta-miR-EIA16_9814	aaaauccgagugaacuuuuugg	22	aaaaguuugcuuggguuucccuguaagauguuauaggaaaauccgagugaacuuuuugg	16:21113334..21113393:-
bta-miR-EIA17_10827	ggcggcggcggcgccggggcg	21	agccggggcgggggcgccggagcggaggaaacaaaaggcuaaggcggcggcggcgccggggcg	17:72247501..72247564:+
bta-miR-EIA17_10827	ggcggcggcggcgccggggcg	21	agccggggcgggggcgccggagcggaggaaacaaaaggcuaaggcggcggcggcgccggggcg	17:72247501..72247564:+
bta-miR-EIA17_11236	aaagcccgaaugaacuuuuuag	22	aaaaaguucauugggguuuucuguaacaucuuuuggaaaagcccgaaugaacuuuuuag	17:56579527..56579586:-
bta-miR-EIA18_12944	ugucucaguucagcaggaag	20	ugaggcuugagacuagcaagagagggaggcccaaugcccccucgcugucucaguucagcaggaag	18:61858363..61858428:-
bta-miR-EIA2_15537	ggggcgguacaccugucaaacgg	23	cggggacagugccagguggggagcuugaauggggcgguacaccugucaaacgg	2:66271409..66271462:+
bta-miR-EIA2_15753	aaacccagacgaacuuuuuggc	22	aaaaaguucguucggguuuucuguacccccucaugaagaaacccagacgaacuuuuuggc	2:116570331..116570391:+
bta-miR-EIA2_15753	aaacccagacgaacuuuuuggc	22	caaaaaguucauuuggauuuuccauaagacguucuugggaaaacccagacgaacuuuuuggc	1:154705486..154705548:+
bta-miR-EIA2_15753	aaacccggaugaacuuuuuggc	22	caaaaaguucauuugaacuuuuccauaaguuguuacaaaaacccggaugaacuuuuuggc	3:87752825..87752885:-
bta-miR-EIA2_15753	aaacccagacgaacuuuuuggc	22	aaaaaguucguucggguuuucuguacccccucaugaagaaacccagacgaacuuuuuggc	2:116570331..116570391:+
bta-miR-EIA2_16195	acucuucccucccucggccggc	22	acucuucccucccucggccggcgcucucgcguucggcugccagccgggacugggaggaag	2:31531409..31531469:-
bta-miR-EIA22_19288	aagcccagaugaacuuuuug	20	aaaaaguuuauuuggguuuuucaauaucauacggaaagcccagaugaacuuuuug	22:17257282..17257337:-
bta-miR-EIA22_19288	aagcccagaugaacuuuuug	20	aaaaaguucauucaaguuuuccuguaacaucguauggaaaagcccagaugaacuuuuug	12:80886589..80886648:-
bta-miR-EIA23_20600	ugcaccacccguggucacuccu	22	ucagugaucagugccuggugggcaugcaugcacuucccaugcaccacccguggucacuccu	23:28502262..28502323:-
bta-miR-EIA25_22981	aggcaacgggcuuggcggag	20	aggcaacgggcuuggcggaggcuugucccgcuccuccuuagcccguucccugagc	25:41216921..41216976:-
bta-miR-EIA26_23261	acaggcacggccaguuugagc	21	acaggcacggccaguuugagcauuuucacugaauugccaaaccaguugugccuguaga	26:33108886..33108944:+
bta-miR-EIA26_23705	cagggcgggaacgggcugcggga	23	cagggcgggaacgggcugcgggaggcugcuggggccgggagcgccgggacaggugcgugaucgcccuuuc	26:33005147..33005217:-
bta-miR-EIA26_23720	uggcaccagcacuggcggugg	21	cgcuggcaguguugguggcacuugcgugggggcgguggcaccagcacuggcggugg	26:37549333..37549389:-
bta-miR-EIA28_24643	uucggcgccaccacccugcgggu	23	uucggcgccaccacccugcgggucgcgcuguaagaucuugccccgcggguguucgcccacc	28:8597866..8597927:-
bta-miR-EIA28_24810	aaacccugaacgaacuuuuugg	22	aaaaguuuguucagguuucuguaagauggugcaaaacccugaacgaacuuuuugg	28:33517923..33517978:-
bta-miR-EIA28_24810	aaacccugaacgaacuuuuugg	22	aaaaagugcauucagauuuugccauaagagcguauggaaaacccugaacgaacuuuuugg	15:21667107..21667167:-
bta-miR-EIA28_24810	aaacccugaacgaacuuuuugg	22	aaacccugaacgaacuuuuuggccaacccaauacuucucggcaugguuuug	28:33517894..33517945:-
bta-miR-EIA3_26082	gaaaguuuguugggguuuuucu	22	gaaaguuuguugggguuuuucugucacauuuaacagaaaagcccaaaugaacuuuuugg	3:2852302..2852361:+
bta-miR-EIA3_26112	gaccagugcgaggccuguggg	21	gaccagugcgaggccugugggagauggcgucaaagaaaugccucacaggccacccacuucucau	3:8888370..8888434:+
bta-miR-EIA3_26811	aaaaaccugaaugacccuuuugg	23	aaaagguucauuuggguuucuccaugccaucuuacggaaaaaccugaaugacccuuuugg	3:94548589..94548649:+
bta-miR-EIA4_28627	acacgcguccuuggauccugacu	23	ucggggcccagggccgguguguuuguugccuuaggaacacacgcguccuuggauccugacu	4:119142850..119142911:+
bta-miR-EIA4_28974	aaacccugaugaacuuuuug	20	aaaaguucauuugggcuuuuucauaagauguuacagaaaaacccugaugaacuuuuug	4:86669292..86669350:-
bta-miR-EIA5_29929	aaaacucgagcaaacuuuuugg	22	aaaagguucauucggguuuuuccuuaagauguuacagaaaaacucgagcaaacuuuuugg	5:94727164..94727224:+
bta-miR-EIA5_31186	cccaccgcucuccucccgcc	20	uggggggagggggcgggucagacggcccaccgcucuccucccgcc	5:115502664..115502709:-
bta-miR-EIA6_31816	aaaacacgaacaaacuuuuug	21	aaacguucguucagguuuuucuagaauauuuugcaggaaaacacgaacaaacuuuuug	6:94664382..94664440:+
bta-miR-EIA6_31816	aaaacacgaacaaacuuuuug	21	aaaguucguuggaguuucucuguuacauuguacagaaaaacacgaacaaacuuuuug	X:125791316..125791373:-
bta-miR-EIA6_31816	aaaacacgaacaaacuuuuug	21	aaacguucguucagguuuuucuagaauauuuugcaggaaaacacgaacaaacuuuuug	6:94664382..94664440:+
bta-miR-EIA7_33603	uuguccaaugaguuaguccuu	21	uuguccaaugaguuaguccuucacaucagguggccaaaguauuggaguuucagc	7:1872565..1872619:-
bta-miR-EIA8_34797	aaacccgaacgaacuuuuug	20	aaaaguuugcuuggguuuuucuguaagauguuacaggggaaacccgaacgaacuuuuug	8:36222132..36222191:+
bta-miR-EIA9_35954	cgaggaaucucugguggaggu	21	cgaggaaucucugguggagguauaugucagcaguggcccugcaggguuggggccacugagugcagcagugccugcaugggaccuuuug	9:7428818..7428906:+
bta-miR-EIA9_36645	aaagguucguucggguuuuucu	22	aaagguucguucggguuuuucugugcagccuacagaaaaaaaccaaaugaaaguuuug	9:62244984..62245042:-
bta-miR-EIAX_37095	aagcccagaugaacuuuuuggc	22	aaaaaguuugcuuggguuuucccauaagaugcuaugaaaaagcccagaugaacuuuuuggc	X:2135947..2136008:+
bta-miR-EIAX_37095	aagcccagaugaacuuuuuggc	22	aaaaaguuugcuuggguuuucccauaagaugcuaugaaaaagcccagaugaacuuuuuggc	X:2135947..2136008:+
bta-miR-EIAX_37814	caacccugaaugaacuuuuugg	22	aaaaaguuuguucagguauuuacaucagauguuaugacaacccugaaugaacuuuuugg	X:6552542..6552601:-
bta-miR-EIAX_37814	caacccugaaugaacuuuuugg	22	aaaaaguuuguucggaucauauggccaacccugaaugaacuuuuugg	3:85682148..85682195:+
bta-miR-EIAX_37923	aaggggacgacagaggaugaga	22	uuccucccgccccccccccuuuuuagcagcuccccgaggcauguggaaucuuagugccugacuagggaaaggggacgacagaggaugaga	X:30969085..30969175:-
bta-miR-EIAX_38151	uuacaauacaaccugauaagu	21	uuacaauacaaccugauaagugcuguaacacuuaucagguuguauuauaaug	X:81951231..81951283:-
